# Supplementary material
Source: PubMed Central journal article supplement (PMC6677597)
Supplement: NIHMS1532810-supplement-5.pdf [file NIHMS1532810-supplement-5.pdf]

## **IRF1 inhibits antitumor immunity through the upregulation of PD-L1 in the tumor cell.**

**Lulu Shao<sup>1,3</sup>, Weizhou Hou<sup>1</sup>, Nicole E. Scharping<sup>2,4</sup>, Frank P. Vendetti<sup>5</sup>, Rashmi Srivastava<sup>1,3</sup>, Chandra N. Roy<sup>1,3</sup>, Ashley V. Menk<sup>2,4</sup>, Yiyang Wang<sup>2,4</sup>, Joe-Marc Chauvin<sup>4</sup>, Pooja Karukonda<sup>5</sup>, Stephen H. Thorne<sup>1</sup>, Veit Hornung<sup>6</sup>, Hassane M. Zarour<sup>4</sup>, Christopher J. Bakkenist<sup>5</sup>, Greg M. Delgoffe<sup>2,4</sup> and Saumendra N. Sarkar<sup>\*,1,3,4</sup>**

### **SUPPLEMENTARY FIGURE LEGENDS:**

#### **Fig. S1: Loss of IRF1 in tumor cells caused slower tumor growth rate in mice.**

(A), (B) and (C) Validation of IRF1 deficiency in IRF1-KO MC38, B16-F10 and CT26 cells. Cell lysates from mouse IFN $\gamma$  treated WT and IRF1-KO cells were analyzed for IRF1 expression by immunoblotting.

(D), (E) and (F) Tumor growth rate of MC38, B16-F10 and CT26 WT and IRF1-KO cells in each mouse. Mice were subcutaneously or intradermally injected with  $10^6$  or  $5 \times 10^5$  cells, followed by tumor growth measurements.

#### **Fig. S2: Depletion of CD8<sup>+</sup> T cells enables B16-F10 IRF1-KO cells to establish tumor.**

(A) Percentage of CD8<sup>+</sup> T cell of total CD3<sup>+</sup> splenic cells. MC38 IRF1-KO inoculated mice were injected with anti-CD8 Ab or rat IgG2b isotype control. After finishing tumor growth experiment, mice were sacrificed. Spleens were collected and splenic cells suspension was prepared for CD8<sup>+</sup> T

cell staining. For each column mean and SEM were plotted, statistical significance calculated by unpaired student t test, and represented as \*\*\*\* P < 0.0001.

(B) Individual tumor growth in each mouse re-challenged with WT MC38 cells (fig. 2B). Following complete regression of MC38 IRF-1 KO tumors (n=8), mice were re-challenged with MC38 WT tumor cells on day 47 of post-injection. 7 out of 8 mice showed complete tumor regression.

(C) Tumor growth of B16-F10 IRF1-KO cells in CD8<sup>+</sup> T cell depletion C57BL/6 mice.  $5 \times 10^5$  of B16-F10 WT or IRF1-KO cells were intradermally injected into C57BL/6 mice (n=5). IRF1-KO cell injection groups of mice were intraperitoneally injected with 250  $\mu$ g of anti-CD8 antibody or rat IgG2b isotype control 2-day before tumor cell injection, then followed by antibody or isotype control injections twice a week.

(D) Percentage of CD8<sup>+</sup> T cell of total CD3<sup>+</sup> splenic cells in mice. Mice were sacrificed at the end of the experiment. spleens were collected and splenic cells suspension was prepared for CD8<sup>+</sup> T cell staining. For each column mean and SEM were plotted, statistical significance calculated by unpaired student t test, and represented as \*\*\*\* P < 0.0001.

(E)  $10^6$  of CT26 IRF1-KO cells were subcutaneously injected into BALB/c mice (n=5). 4 out of 5 mice had complete tumor regression by day 15 of post-injection and were sacrificed at 30 days after complete tumor regression. 1 out of 5 mouse which had tumor was sacrificed as a positive control. Naïve mice were used as negative control. Representative flow cytogram (left) and percentage of CD8<sup>+</sup> tetramer<sup>+</sup> cells in T<sub>EM</sub> (right) in the spleen and dLNs. For each column mean and SEM were plotted, statistical significance calculated by unpaired student t test. \* P < 0.05.

**Fig. S3: IRF1 deficiency in tumor cells have no significant impact on and the frequencies of MDSCs and NK cells.**

$5 \times 10^5$  of B16F10 WT or IRF1-KO cells were intradermally injected into C57BL/6 mice (n=5). Tumors were collected around size  $100\text{mm}^3$ . Flow cytometry analysis of infiltrated granulocytic MDSC (A), monocytic MDSC (B), NK cells (C) has been conducted. For each column mean and SEM were plotted.

**Fig. S4: Mouse IFN $\gamma$ -induced mRNA expression of STAT1 and GBP2 in B16-F10 WT and IRF1-KO cells.**

(A-B) The mRNA expression levels of STAT1 and GBP2 in B16-F10 WT and IRF1-KO cells were detected using TaqMan real-time PCR after 0-8 hrs mouse IFN $\gamma$  induction. For each time point, mean and SEM were plotted, statistical significance calculated by two-way ANOVA with Sidak's multiple comparison test, and presented as \*\*\* P < 0.001, \*\*\*\* P < 0.0001. (C) The geometric mean (MFI) of PD-L1 in B16-F10 WT and IRF1-KO cells after 6 hrs treatment of mouse IFN $\alpha$ , IFN $\gamma$ , TGF $\beta$ 1 and TNF $\alpha$ .
